# Supplementary material
Source: MDPI journal article supplement (https://www.mdpi.com/2673-9992/14/1/81)
Supplement: s1 [file s1]

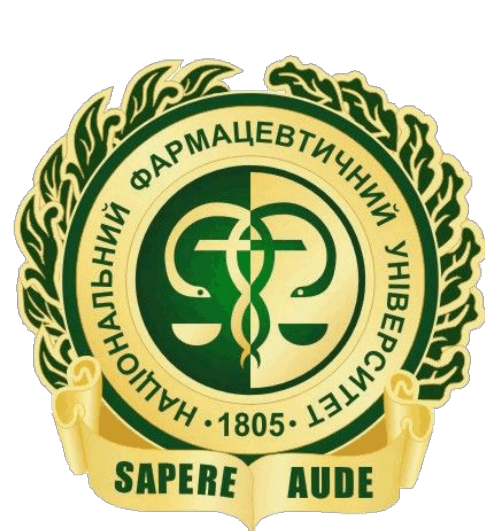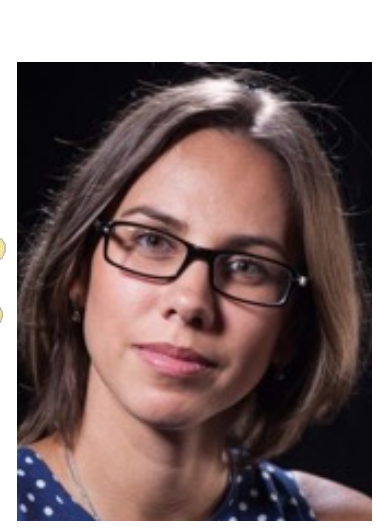

# Anti-inflammatory evaluation of Ukrainian herbal extracts

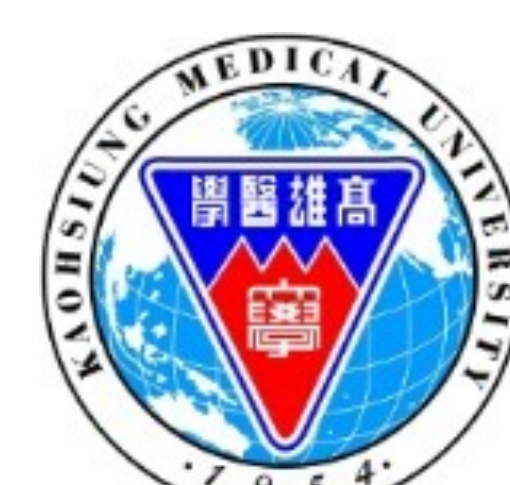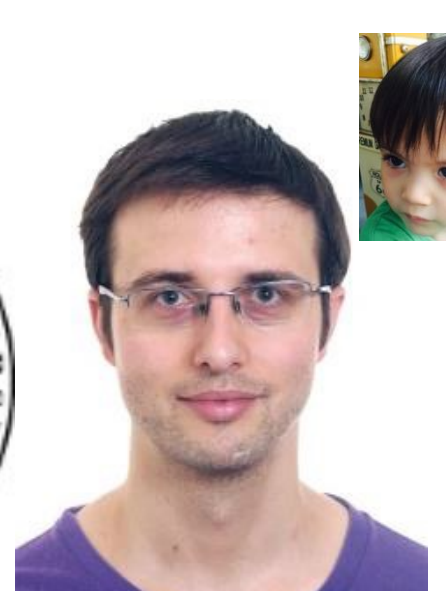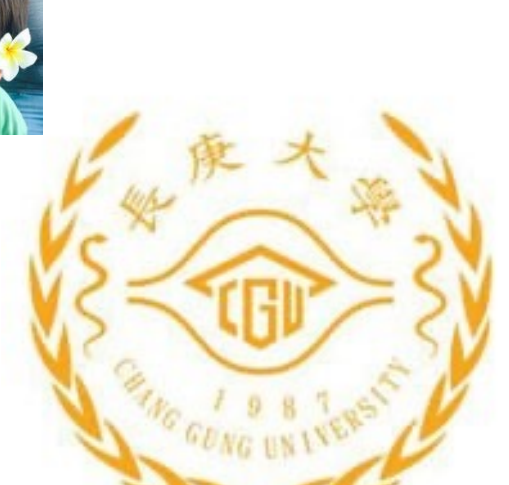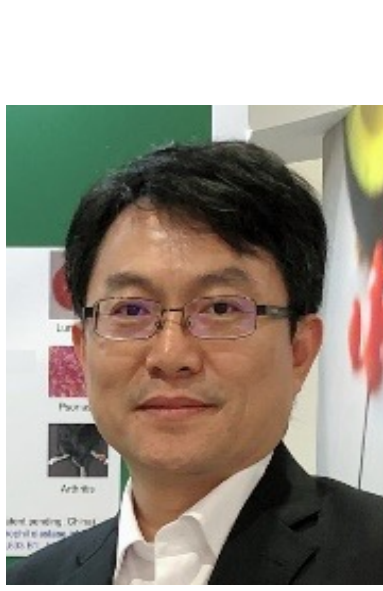

mykhailenko.farm@gmail.com

uminska.kateryna@pharm.zt.ua

michalk@kmu.edu.tw

htl@mail.cgu.edu.tw

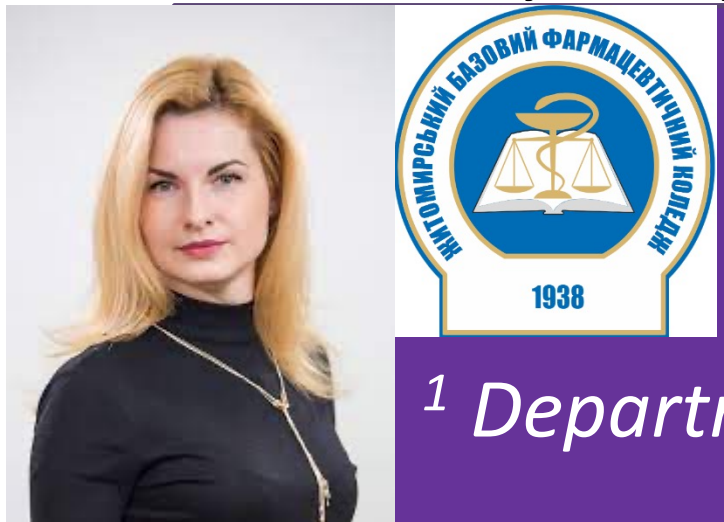

Olha Mykhailenko<sup>1†,\*</sup>, Michal Korinek<sup>2,3†</sup>, Kateryna Uminska<sup>4</sup>, Mohamed El-Shazly<sup>5</sup>, Liudas Ivanauskas<sup>6</sup>, Fang-Rong Chang<sup>2</sup>, Victoriya Georgiyants<sup>1</sup> and Tsong-Long Hwang<sup>3,7,8</sup>

<sup>1</sup> Department of Pharmaceutical Chemistry, National University of Pharmacy of Ministry of Health of Ukraine, 4-Valentinivska st., 61168 Kharkiv, Ukraine;

<sup>2</sup> Graduate Institute of Natural Products, College of Pharmacy, Kaohsiung Medical University, Kaohsiung 80708, Taiwan;

<sup>3</sup> Graduate Institute of Natural Products, College of Medicine, Chang Gung University, Taoyuan 33302, Taiwan;

<sup>4</sup> Zhytomyr Basic Pharmaceutical Professional College, Chudnivska str., 99, Zhytomyr, 10005, Ukraine,

<sup>5</sup> Department of Pharmacognosy, Faculty of Pharmacy, Ain-Shams University, Cairo 11566, Egypt;

<sup>6</sup> Department of Analytical and Toxicological Chemistry, Lithuanian University of Health Sciences, A. Mickeviciaus g. 9, LT 44307 Kaunas, Lithuania,

<sup>7</sup> Research Center for Chinese Herbal Medicine, Research Center for Food and Cosmetic Safety, and Graduate Institute of Health Industry Technology, College of Human Ecology, Chang Gung University of Science and Technology, Taoyuan 33302, Taiwan

<sup>8</sup> Department of Anesthesiology, Chang Gung Memorial Hospital, Taoyuan 33305, Taiwan

\* Correspondence: mykhailenko.farm@gmail.com; +380509277385 (O.M.), † These authors contributed equally to this work

## DEDICATED TO PEOPLE OF UKRAINE

### Background

- Neutrophils play a crucial role in protection against intracellular pathogens such as viruses and mycobacteria but also in regulating systemic anaphylaxis or allergic skin reactions. **Neutrophils intimately shape the adaptive immune response** at various levels, including B cells, dendritic cells, and T cell populations.
- Significant attention in pharmacy is given to the search for **natural substances** that can affect the immune system and neutrophil function, with less adverse side effects.
- The current study further extends the analysis of various groups of biologically active substances in extracts from Ukrainian plants.

### Materials & Methods

**Plant samples:** polysaccharide complexes of *Crocus* flowers and corms, *Juno* leaves and corms, *Iris* leaves and rhizomes, *Chamaenerion* and *Epilobium* leaves; water and ethanolic extracts *Chamaenerion* and *Epilobium* leaves.

**HPLC Analysis:** The chemical analysis of *Chamaenerion* composition was performed by using Waters e2695 Alliance HPLC system coupled with a 2998 PDA detector (Waters, Milford, MA, USA). Phenolic compounds were separated on an ACE Super C18 (250 mm × 4.6 mm, 3 μm) column (ACT, Aberdeen, UK) with a full run time 81 min at 25 °C. The gradient elution mode of 0.1% (v/v) trifluoroacetic acid in pure water (A) and acetonitrile (B) was as follows: 0 min, 5% B; 8–30 min, 20% B; 30–48 min, 40% B; 48–58 min, 50% B; 58–65 min, 50%; 65–66 min, 95% B, 66–70 min, 95% B, 70–81 min, 5% B. Flow rate 1 mL/min, injection volume 10 μL.

**Pharmacology tested:** *Anti-inflammatory:* Superoxide anion generation and elastase release assay induced by fMLF/CB in human neutrophils (respiratory burst and degranulation). *Antivirus:* Coronavirus strain Omicron pseudotyped lentivirus assay in hACE-2 overexpressed cells (virus entry).

Design of Experience

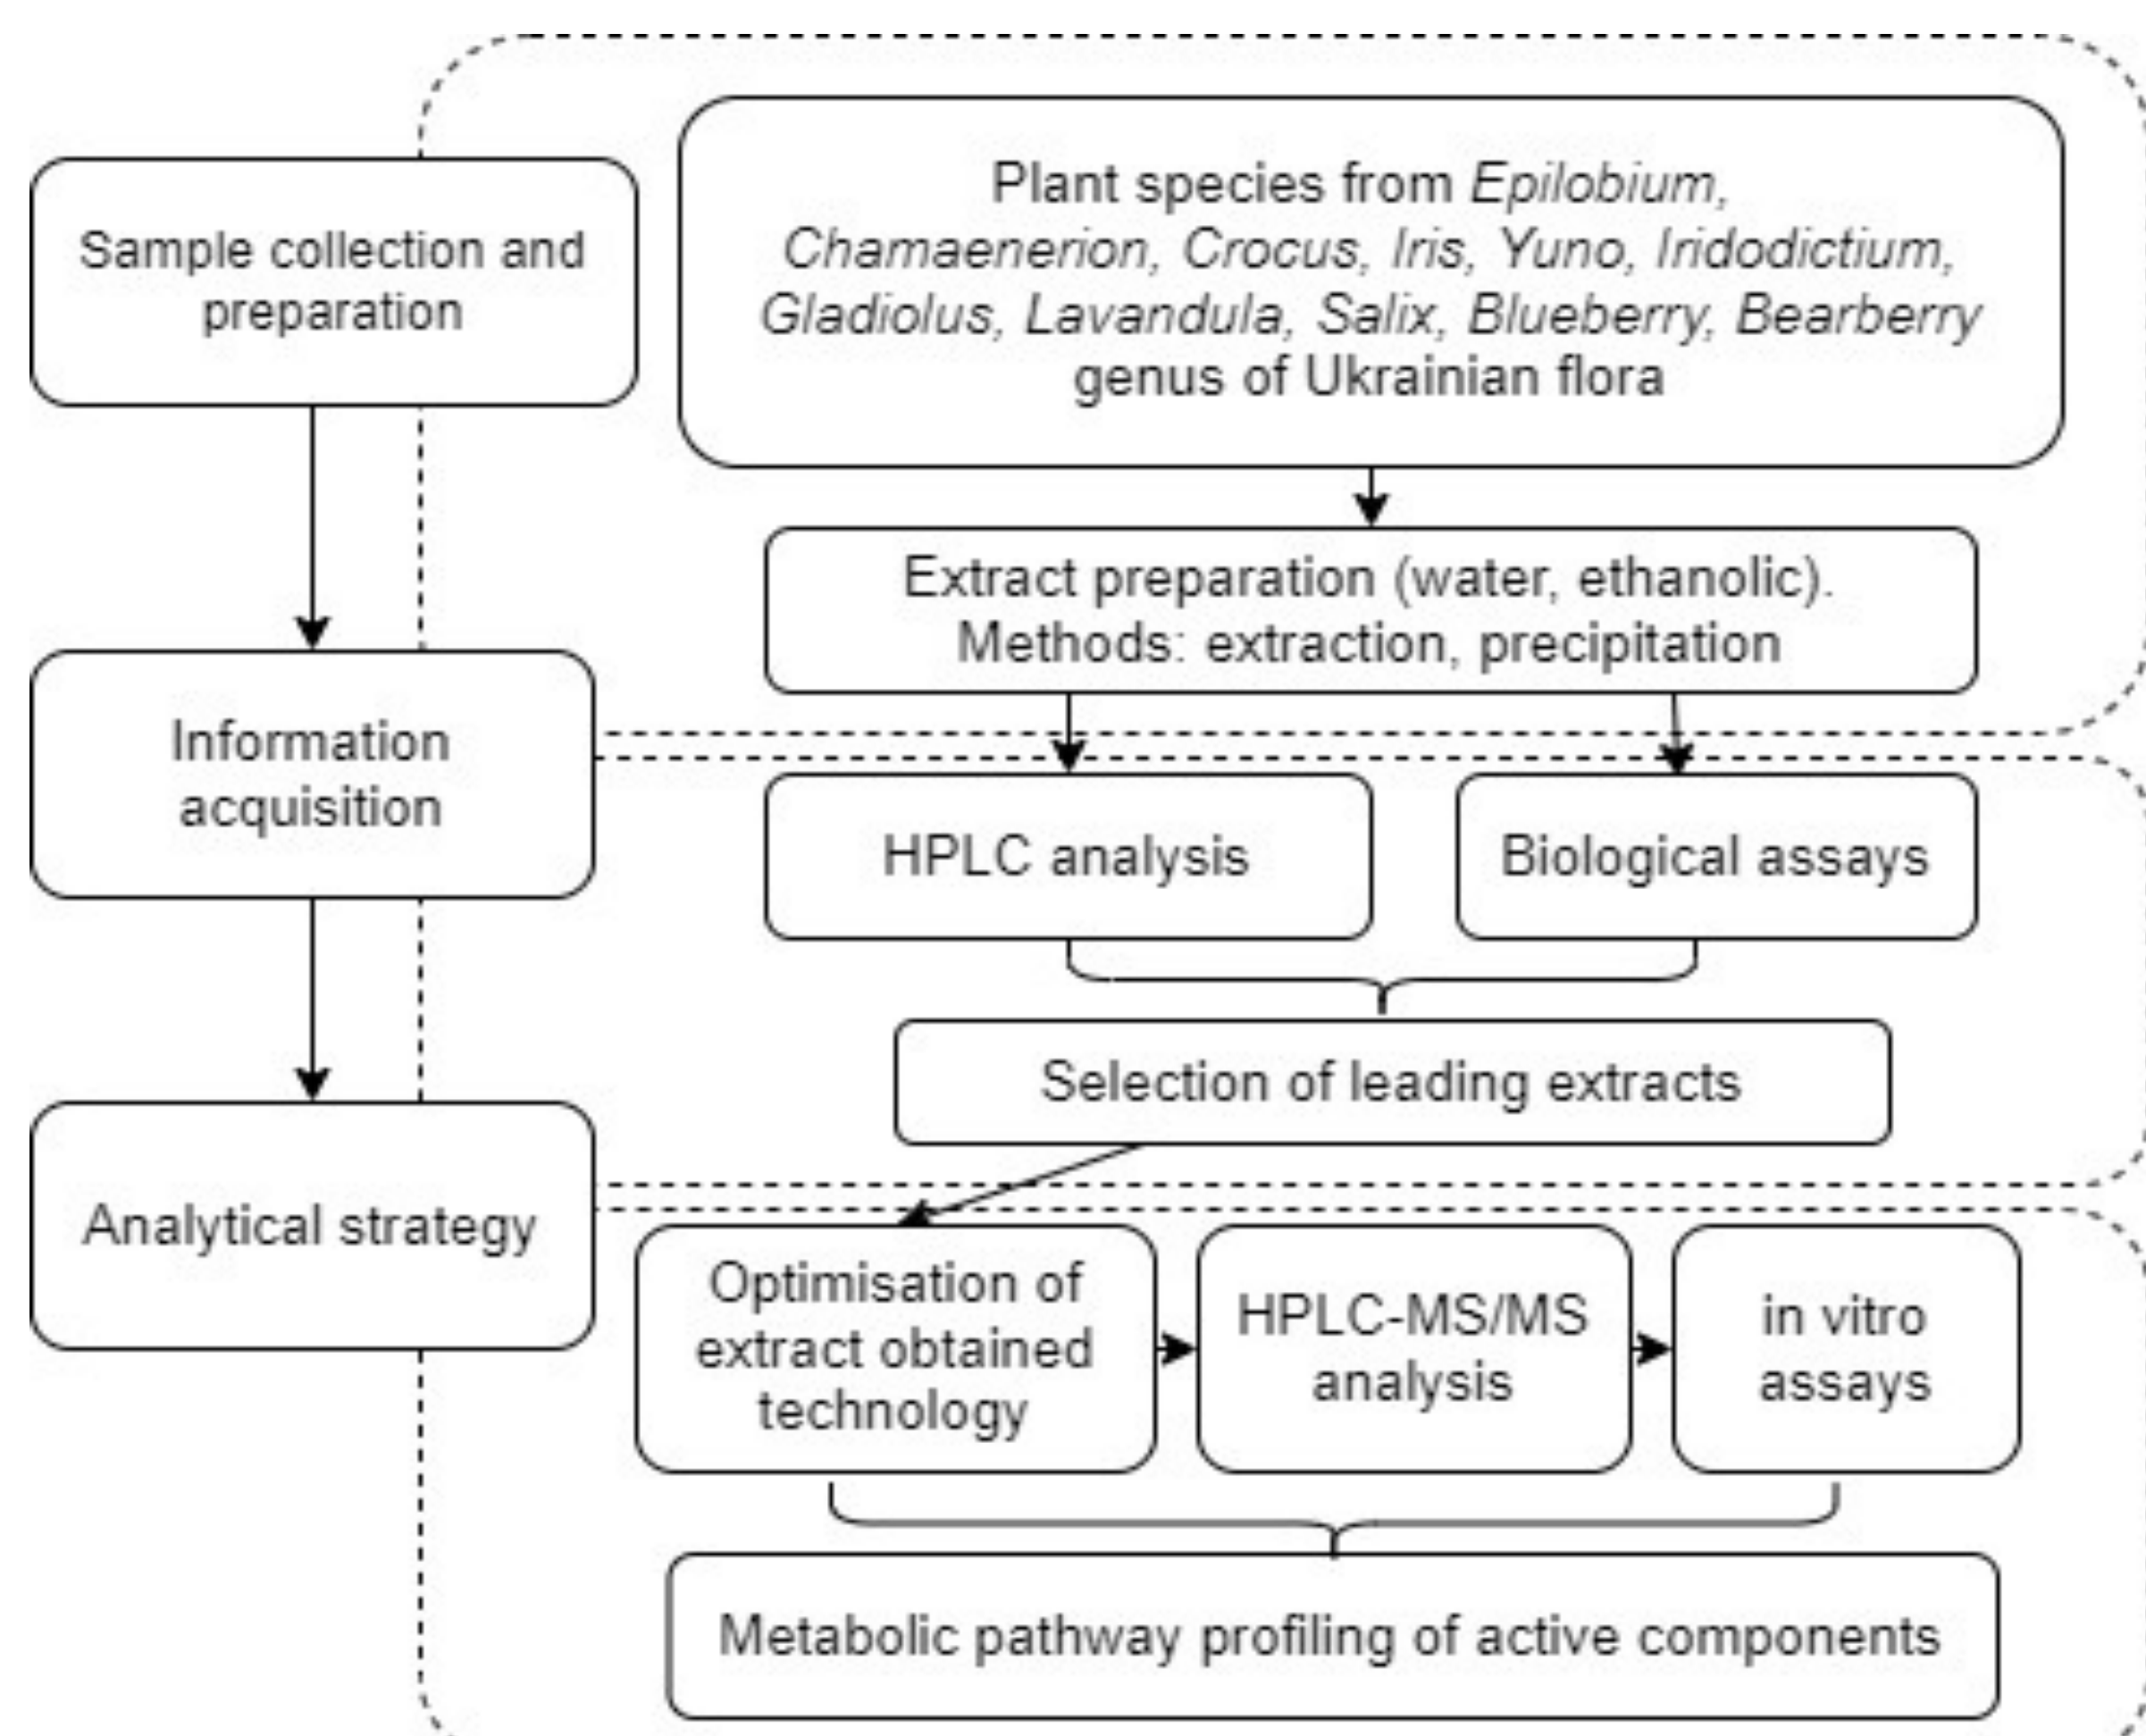

Work flow of the analytical procedure of identification of secondary metabolites and the bioactive principles

### Pharmacological analysis results

| Sample                                                                                | Superoxide        |                  | Elastase release  |      |
|---------------------------------------------------------------------------------------|-------------------|------------------|-------------------|------|
|                                                                                       | Inh% <sup>a</sup> | Inh%             | Inh%              | Inh% |
| 1 Dry polysaccharide extract of <i>Crocus sativus</i> flowers <sup>bd</sup>           | 9.15 ± 4.01       | 17.91 ± 1.66 *** | 2.04 ± 1.50       |      |
| 2 Dry polysaccharide extract of <i>Crocus sativus</i> corms <sup>cd</sup>             | 37.07 ± 1.21      | 3.56 ± 0.54 **   | 0.64 ± 1.02       |      |
| 3 Dry polysaccharide extract of <i>Juno bucharia</i> leaves <sup>bd</sup>             | 43.00 ± 2.58      | 8.38 ± 0.96 ***  | 2.09 ± 2.82       |      |
| 4 Dry polysaccharide extract of <i>Juno bucharia</i> corms <sup>bd</sup>              | 43.08 ± 2.17      | 3.55 ± 1.58      | 2.46 ± 3.38       |      |
| 5 Dry polysaccharide extract of <i>Iris hungarica</i> leaves <sup>b</sup>             | 43.40 ± 0.57      | 7.84 ± 2.76 *    | 39.02 ± 2.98 ***  |      |
| 6 Dry polysaccharides extract of <i>Iris hungarica</i> rhizomes <sup>bd</sup>         | 36.88 ± 1.47      | 1.04 ± 0.80      | 1.43 ± 3.34       |      |
| 7 Dry <i>Iridodictium</i> Dight leaves extract <sup>b</sup>                           | 19.87 ± 1.80      | 17.54 ± 0.79 *** | 18.79 ± 4.86 *    |      |
| 8 Dry <i>Iridodictium</i> Cantab leaves extract <sup>cd</sup>                         | -27.29 ± 1.08     | 18.39 ± 1.85 *** | 25.84 ± 6.26 **   |      |
| 10 Dry <i>Crocus stigma</i> extract 80% ethanol <sup>b</sup>                          | 6.55 ± 0.93       | 17.80 ± 6.76     | 44.70 ± 7.17 **   |      |
| 11 Water extract of <i>Lavandula angustifolia</i> <sup>b</sup>                        | 39.98 ± 1.75      | 49.02 ± 1.31 *** | 23.71 ± 2.50 ***  |      |
| 12 Polysaccharides extract of <i>Chamaenerion angustifolium</i> <sup>bd</sup>         | 46.72 ± 0.32      | 45.49 ± 0.60 *** | 17.24 ± 4.82 *    |      |
| 13 Water extract of <i>Chamaenerion angustifolium</i> <sup>b</sup>                    | 55.18 ± 1.60      | NT               | 89.61 ± 6.82 ***  |      |
| 14 Ethanolic (50%, vol/vol) extract of <i>Chamaenerion angustifolium</i> <sup>b</sup> | 53.84 ± 0.97      | NT               | 93.81 ± 5.94 ***  |      |
| 15 Polysaccharides extract of <i>Epilobium hirsutum</i> <sup>bd</sup>                 | 38.39 ± 1.54      | 43.96 ± 1.93 *** | 14.98 ± 3.51 *    |      |
| 16 Water extract of <i>Epilobium hirsutum</i> <sup>b</sup>                            | 46.13 ± 0.68      | NT               | 85.76 ± 3.55 ***  |      |
| 17 Ethanolic (50%, vol/vol) extract of <i>Epilobium hirsutum</i> <sup>c</sup>         | 2.92 ± 3.61       | NT               | 102.81 ± 3.70 *** |      |

Percentage of inhibition at 10 μg/ml. Results are presented as mean±S.E.M. (n = 3). \*\*\* P < 0.001 compared with control (DMSO).

<sup>a</sup> SARS-CoV-2 pseudovirus infection assay, inhibition %; cepharantine served as a positive control, IC<sub>50</sub> 0.95 μM.

<sup>b,cd</sup> different solvent was used due to solubility issues

### Results & Discussions

#### Chemical analysis results

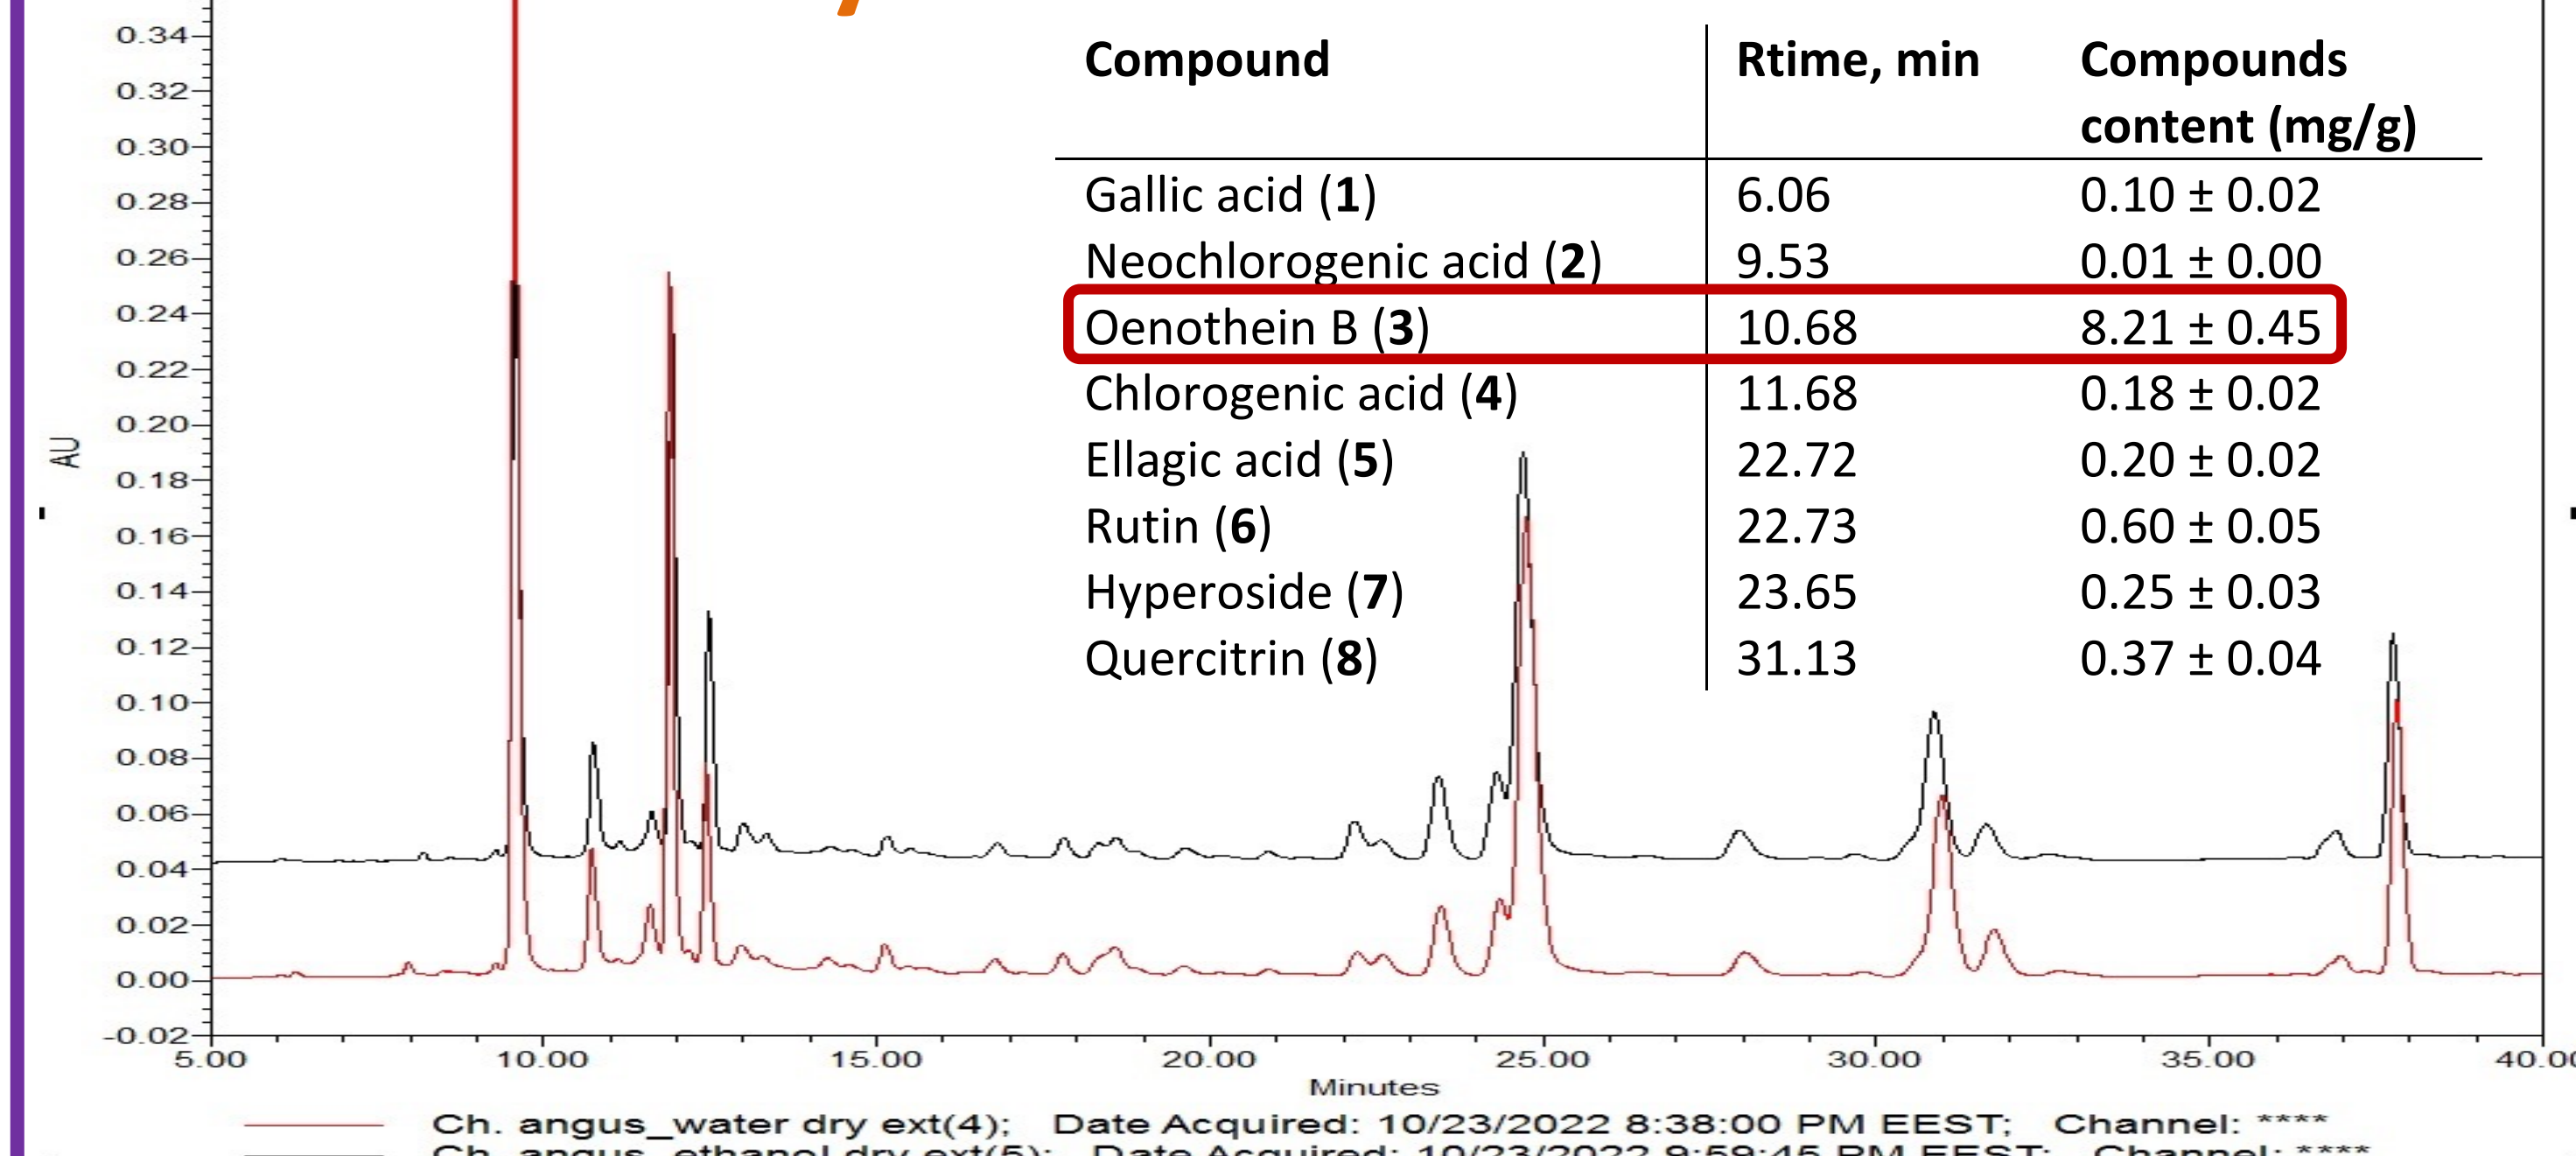

The HPLC-DAD chromatograms of *Ch. angustifolium* extracts. The results of the content of substances in raw materials are given.

### Conclusion

- C. angustifolium* and *E. hirsutum* ethanolic (50%, vol/vol) extracts, both rich in oenothein B, almost completely inhibited fMLF/CB-induced elastase release at 10 μg/mL (IC<sub>50</sub> 2.79 and 2.44 μg/mL, resp.), while *C. angustifolium* extracts exhibited the best anti-Omicron pseudovirus effect
- Interestingly, *Iris* leaf polysaccharides inhibited elastase release by 39.0%, and *C. angustifolium* polysaccharides superoxide by 45.5% at 10 μg/mL
- This suggests that their components - phenolic compounds may possess better activity in comparison to polysaccharides
- The present study provided primary pharmacological evidence for anti-inflammatory agents from *C. angustifolium* and *E. hirsutum*

ECMC  
2022

The 8th International Electronic  
Conference on Medicinal Chemistry  
01-30 NOVEMBER 2022 | ONLINE

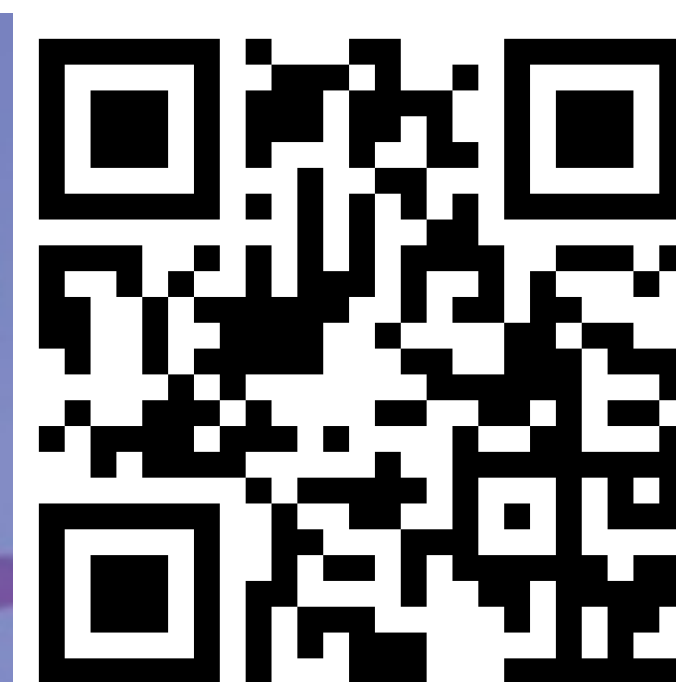

“Neutrophils in ARDS (COVID)”
